# Supplementary material
Source: PubMed Central journal article supplement (PMC2789202)

## qRT-PCR Validation

We measured three genes in an independent time series of GIST-T1 cells treated with IM and compared these to the mean values measured on the arrays from the triplicate measurements described in the text. Measurements were made on both treated GIST-T1 cells and Strategene reference RNA and normalized to simultaneous measurements on HPRT for qRT-PCR. Ratios of GIST-T1 to reference RNA were calculated for comparison to microarray measurements. The plot shows the results for the single PCR measurement against the mean of the array measurements.

It is worth noting that the patterns identified in the paper deconvolve the signatures of many hundreds of genes in each pattern, providing a more robust estimate of the pattern behavior than an individual gene is likely to provide. Nevertheless, the results here show the relative levels of expression are reflected in the array measurements.

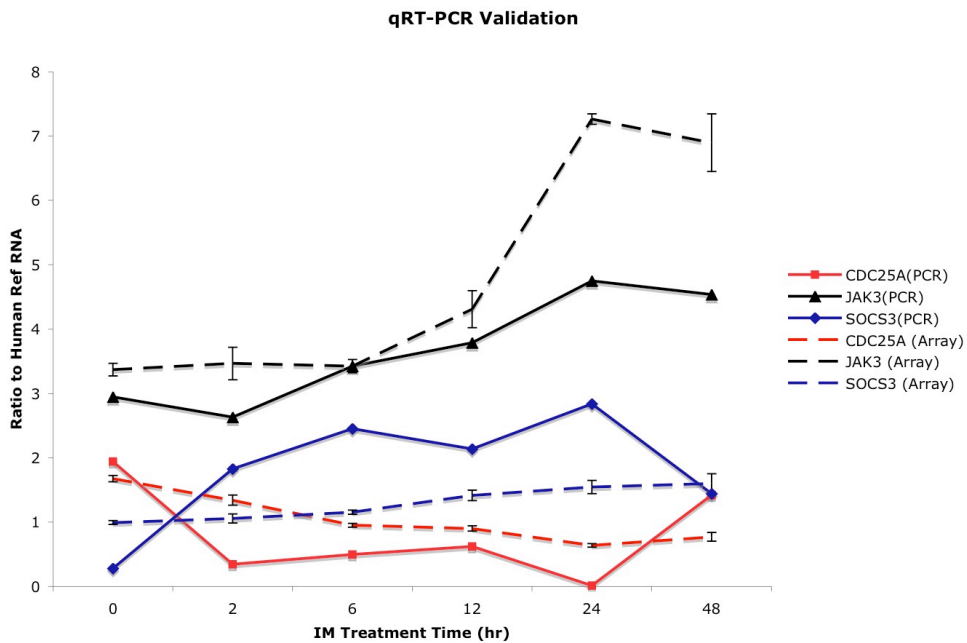

Supplement: NIHMS149886-supplement-4.pdf [file NIHMS149886-supplement-4.pdf]
