# Supplementary material
Source: PubMed Central journal article supplement (PMC2789202)

## pELK1 and pSTAT1 in IM Treated GIST-T1 Cells

The figure below shows the results of immunoblotting for p-STAT3, STAT3, p-ELK1, and ELK1 during IM treatment. As predicted by DESIDE, p-STAT3 rises with treatment, beginning at ~6 – 12 hours. In addition, p-ELK1 declines initially as expected from the downregulation of RAS-RAF signaling during IM treatment, then rises beginning at ~6 – 12 hours as predicted by DESIDE.

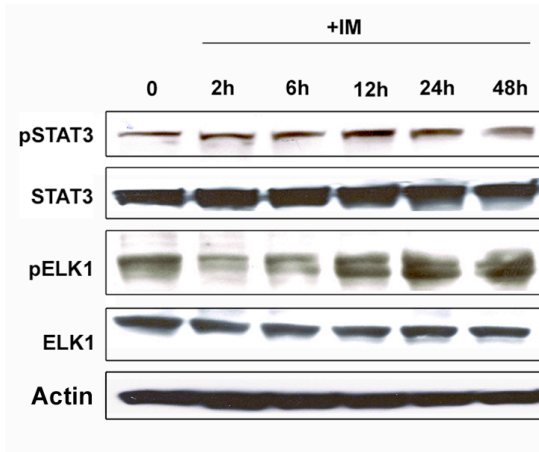

Supplement: NIHMS149886-supplement-6.pdf [file NIHMS149886-supplement-6.pdf]
