# Supplementary material
Source: PubMed Central journal article supplement (PMC2789202)
Supplement: NIHMS149886-supplement-7.pdf [file NIHMS149886-supplement-7.pdf]

## Plots of Patterns in Terms of Tumor Response

The following plots show the three patterns chosen as being at least 1 standard deviation away from the mean for all patterns in terms of overall tumor shrinkage. These plots use the definition of initial tumor response from our previous publication (1). This is

Group A:  $\geq 25\%$  tumor shrinkage after 8–12 wk of imatinib mesylate

Group B:  $\leq 25\%$  tumor shrinkage after 8–12 wk of imatinib mesylate

The plots are ordered with lower initial response on the left and higher initial response on the right.

1. Rink L, Skorobogatko Y, Kossenkov A, et al. Genetic Signatures Indicate Predictable Rapid Response to Imatinib Mesylate Treatment in Gastrointestinal Stromal Tumors. *Mol Cancer Therapeutics* In Press.

# Tumor Pattern 1

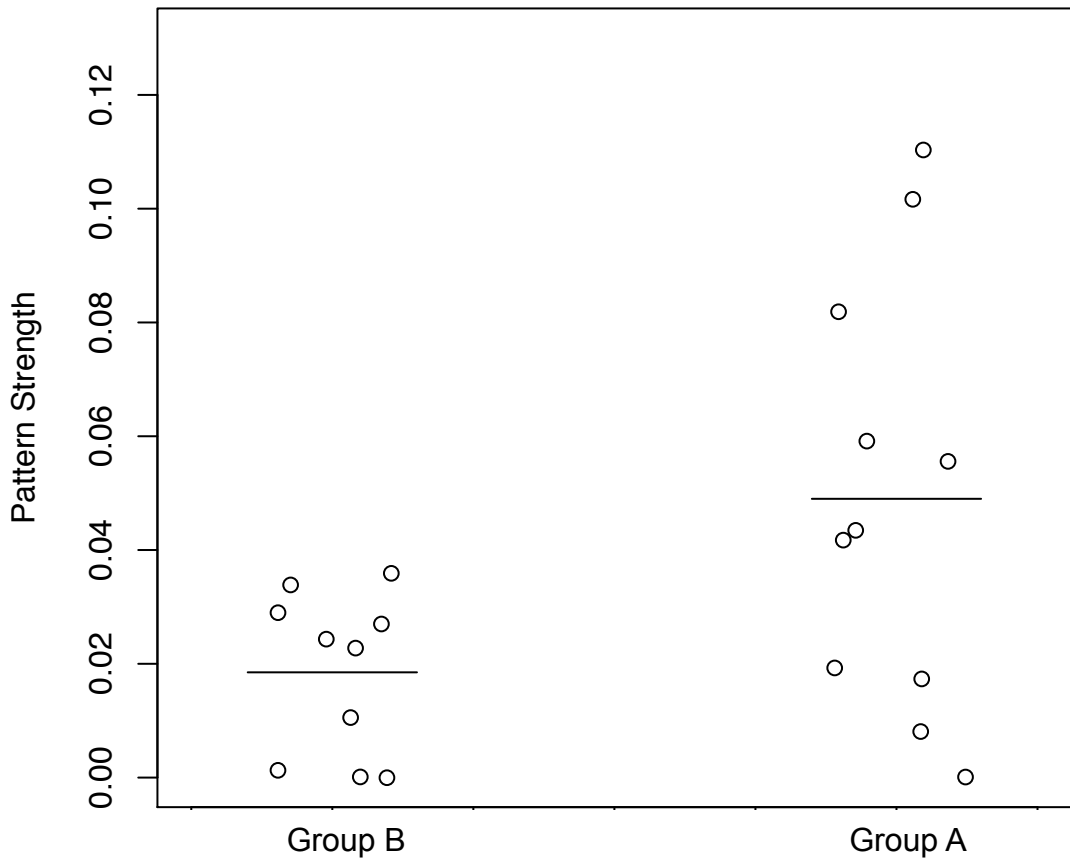

p=0.06

# Tumor Pattern 2

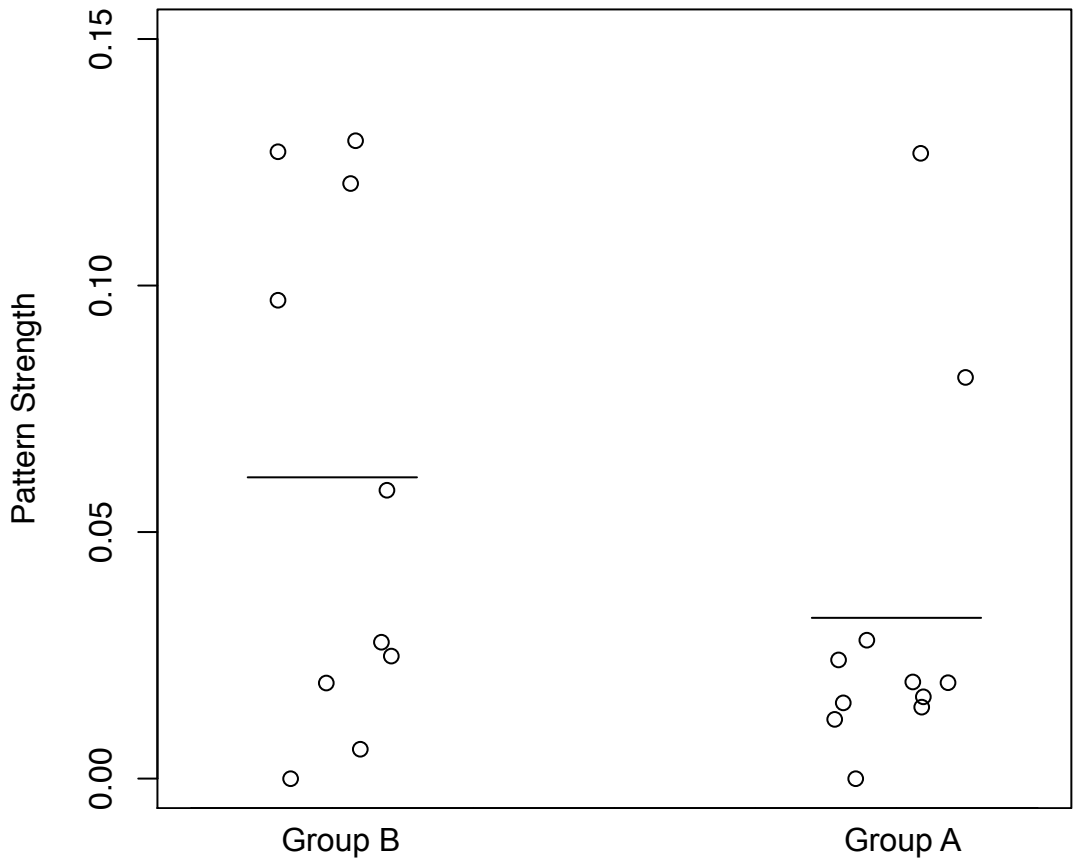

p=0.17

# Tumor Pattern 3

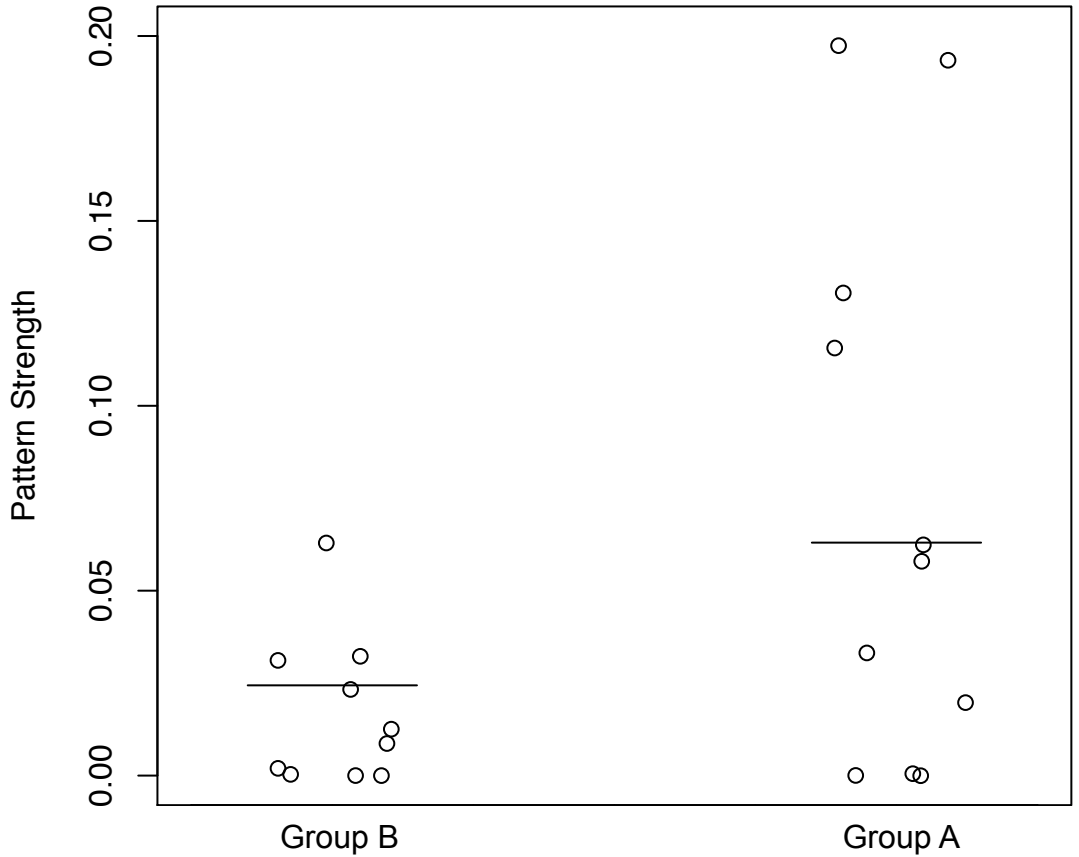

p=0.09
